# Supplementary material for: Interactions Screenings Unearth Potential New Divisome Components in the Chlamydia-Related Bacterium, Waddlia chondrophila
Source: MDPI journal article supplement (doi:10.3390/microorganisms7120617), 2019-11-26
Supplement: s1 [file s1]

# Supplementary Material

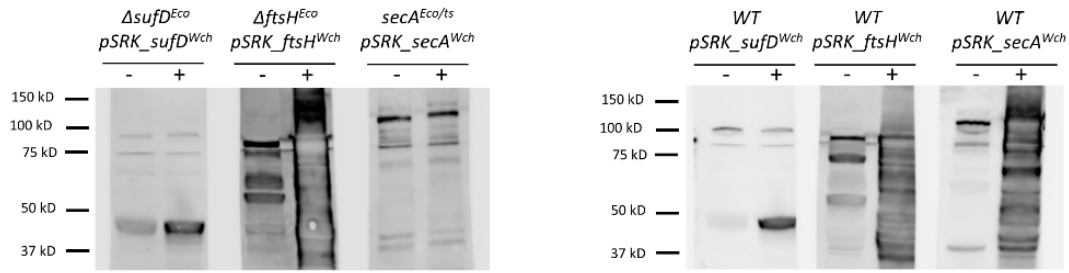

**Figure 1.** Immunoblotting analyses of protein expression in the complemented strains (+) with and (-) without induction, using antibodies raised against recombinant 6xHis-tagged SecA, FtsH, and SufD. SecA, SufD and FtsH proteins of *W. chondrophila* were detected at the right size: SecA-119,387 kDa, FtsH-103,471 kDa, SufD-47,312 kDa.

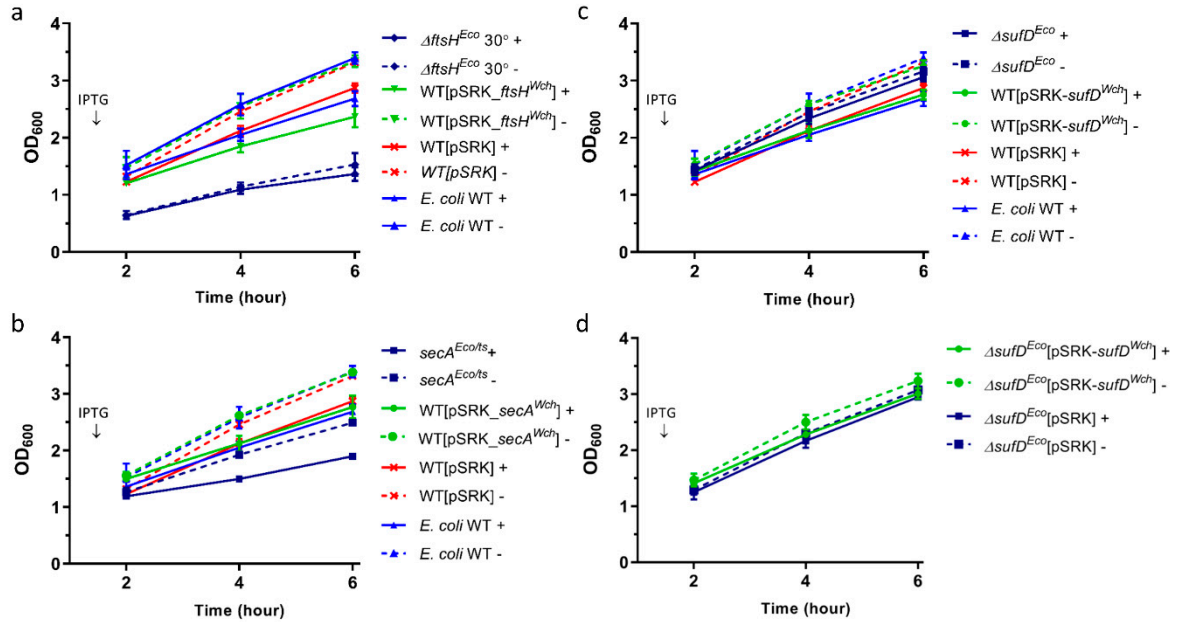

**Figure 2.** Bacterial growth curve pattern expressing *Waddlia* homologues of interest. Solid line (+) with induction, dashed line (-) without induction. (a, b) *secA*<sup>Wch</sup> and *ftsH*<sup>Wch</sup> overexpression in corresponding mutants shows no restored original growth phenotype. (c, d) No restored original phenotype was observed upon *sufD*<sup>Wch</sup> overexpression.

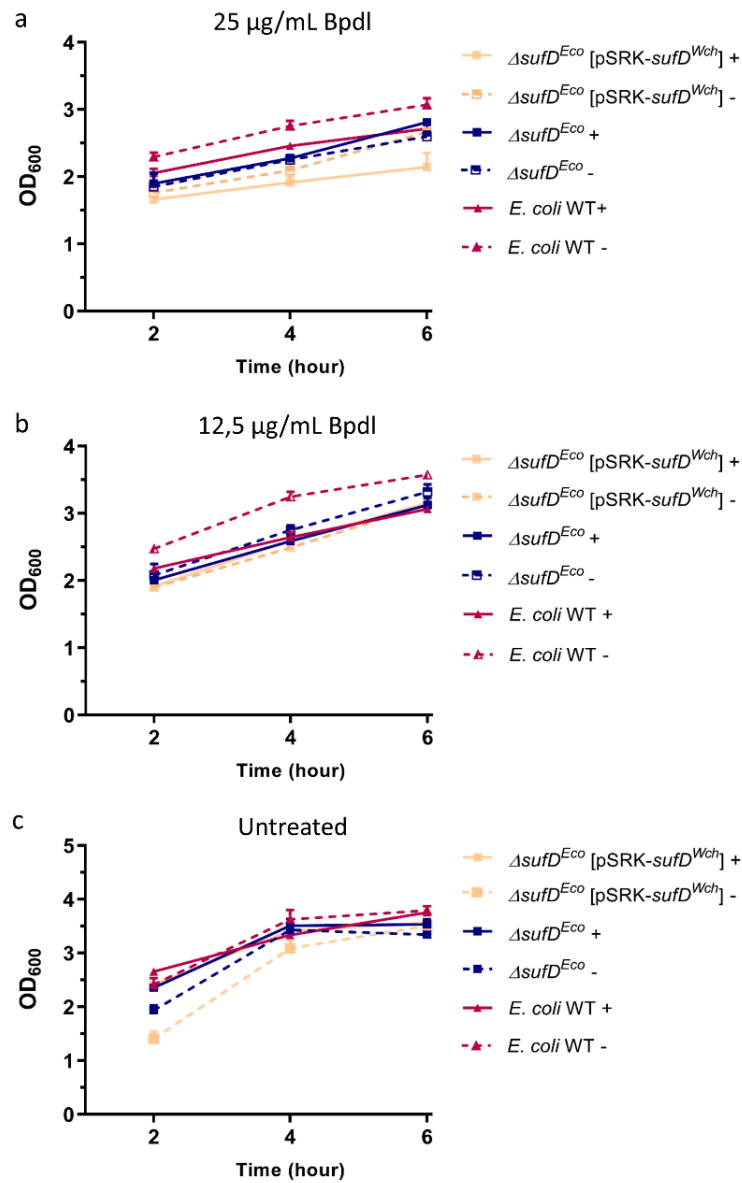

**Figure 3.** Treatment with an iron chelator, 2, 2'-Bipyridyl. Solid line (+) with induction, dashed line (-) without induction. The overnight cultures grown at 37 °C were diluted to an absorbance at 600nm (OD<sub>600</sub>) of 0.05. The diluted cultures were incubated for 1 hour to exponential phase and induced by 1 mM of IPTG (no IPTG was added to the controls) and incubated 1 more hour after the addition of 2, 2'-Bipyridyl addition. Two concentrations of 2, 2'-Bipyridyl were used, (a) 25 µg/mL, (b) 12, 5 µg/mL and (c) control group without an iron chelator. No difference in bacterial growth was observed upon  $\text{SufD}^{\text{Wch}}$  overexpression, independent on the iron chelator concentration.

**Table 1.** Primers used in this study.

|                  |                                                  |
|------------------|--------------------------------------------------|
| FtsH_W_ch_F      | 5'-TTTGGCAAAGAACGACGCAG-3'                       |
| FtsH_W_ch_R      | 5'-TCGGAATGTTTCGACAGCCAA-3'                      |
| SecA_W_ch_F      | 5'-TTGCTGGACAATTTGCTGCC-3'                       |
| SecA_W_ch_R      | 5'-TCAGCGTTTTTCCCTCTCCC-3'                       |
| SufD_W_ch_F      | 5'-ACCGATCCTTTTGCCGTTCT-3'                       |
| SufD_W_ch_R      | 5'-TGCAGACGAGGCTGTACAAG-3'                       |
| ftsH_wch_NdeI_F  | 5'-AAAAAACATATGGCTGACGATAAACAAGATTTT-3'          |
| ftsH_wch_XbaI_R  | 5'-AAAAAATCTAGATTAAGCTCCTAGATCGCTTCT-3'          |
| secA_wch_NdeI_F  | 5'-AAAAAACATATGATCAGTTTTTTCAAGAAATT-3'           |
| secA_wch_XbaI_R  | 5'-AAAAAATCTAGATTATTCGTCAGCCTGATGG-3'            |
| sufD_wch_NdeI_F  | 5'-AAAAAACATATGACTCTTTTCGAGGAACAATTGA-3'         |
| sufD_wch_NotI_R  | 5'-AAAAAAGCGGCCGCTTACCAACCTTTTGTTATTTTCATCCCT-3' |
| Ftsh_K-12_SacI_F | 5'-AAAAAAGAGCTCATGGCGAAAAACCTAATACTCTGG-3'       |
| Ftsh_K-12_XbaI_R | 5'-AAAAAATCTAGATTACTTGTCGCCTAACTGCTCTG-3'        |
| SecA_K-12_NdeI_F | 5'-AAAAAACATATGCTAATCAAATTGTAACTAAAGTT-3'        |
| SecA_K-12_XbaI_R | 5'-AAAAAATCTAGATTATTGCAGGCGGCCATG-3'             |
| sufD_K-12_NdeI_F | 5'-AAAAAACATATGGCTGGCTTACCGAACAG-3'              |
| sufD_K-12_XbaI_R | 5'-AAAAAATCTAGATCATCTTGACCTCCTGGCA-3'            |

**Table 2.** Yeast Two Hybrid hits of RodZ interactors. Split-ubiquitin Yeast-Two-Hybrid screening has been performed with RodZ as a bait and proteins interacting with RodZ have been identified. The domain annotation was retrieved from the online database chlamdb.ch [43].

**Table S2. (a). Yeast Two Hybrid hits of RodZ interactors. A total of 28 putative RodZ interactors conserved in all members of the *Chlamydiales* order.**

| Locus_tag | Protein name | Occurrence in the screen | Product description                                                        | Predicted domains                                                                                                                                                                                                | Similarity                                                                     |
|-----------|--------------|--------------------------|----------------------------------------------------------------------------|------------------------------------------------------------------------------------------------------------------------------------------------------------------------------------------------------------------|--------------------------------------------------------------------------------|
| wcw_0302  | RodA         | 4                        | rod-shape determining protein A. Septum-peptidoglycan biosynthetic protein | PPPF01098: cell cycle protein                                                                                                                                                                                    | belongs to the SEDS family                                                     |
| wcw_0755  | RodZ         | 4                        |                                                                            | PF13413: helix-turn-helix domain                                                                                                                                                                                 |                                                                                |
| wcw_0783  | YbbP         | 4                        | conserved hypothetical membrane protein                                    | PPPF02457: DisA bacterial checkpoint controller nucleotide-binding                                                                                                                                               | belongs to the adenylate cyclase family. DacA/CdaA subfamily                   |
| wcw_1433  | FtsK         | 3                        | DNA translocase ftsK                                                       | PPPF17854: FtsK alpha domain<br>PPPF01580: FtsK/SpoIIIE family<br>PPPF09397: FtsK gamma domain                                                                                                                   | belongs to the FtsK/SpoIIIE/SftA family                                        |
| wcw_0216  | NqrF         | 2                        | Na(+)-translocating NADH-quinone reductase subunit F                       | PPPF00970: oxidoreductase FAD-binding domain<br>PPPF00111: 2Fe-2S iron-sulfur cluster binding domain                                                                                                             | belongs to the NqrF family                                                     |
| wcw_0685  | FtsH         | 2                        | putative cell division protein FtsH                                        | PPPF01434: peptidase family M41<br>PPPF17862: AAA+ lid domain<br>PPPF00004: ATPase family associated with various cellular activities (AAA)                                                                      | belongs to the AAA ATPase family                                               |
| wcw_1947  | -            | 2                        | conserved hypothetical protein                                             | PPPF18095: UPF0242 C-terminal PAS-like domain<br>PPPF06785: uncharacterised protein family (UPF0242) N-terminus                                                                                                  | -                                                                              |
| wcw_0087  | SufD         | 1                        | FeS assembly protein                                                       | PPPF01458: uncharacterized protein family (UPF0051)                                                                                                                                                              | -                                                                              |
| wcw_0231  | Amn          | 1                        | AMP nucleosidase                                                           | PPPF01048: phosphorylase superfamily                                                                                                                                                                             | -                                                                              |
| wcw_0270  | NqrB         | 1                        | Na(+)-translocating NADH-quinone reductase subunit B                       | PPPF03116: NQR2, RnfD, RnfE family                                                                                                                                                                               | belongs to the NqrB/RnfD family                                                |
| wcw_0357  | YaeL         | 1                        | metalloprotease                                                            | PPPF02163: peptidase family M50                                                                                                                                                                                  | -                                                                              |
| wcw_0674  | -            | 1                        | hypothetical protein                                                       | PPPF00589: phage integrase family                                                                                                                                                                                | -                                                                              |
| wcw_0681  | -            | 1                        | putative permease, YjgP/YjgQ family                                        | PPPF03739: lipopolysaccharide export system permease LptF/LptG                                                                                                                                                   | -                                                                              |
| wcw_0738  | GatA         | 1                        | glutamyl-tRNA(Gln) amidotransferase subunit                                | PPPF01425: amidase                                                                                                                                                                                               | belongs to the amidase family. GatA subfamily                                  |
| wcw_0896  | -            | 1                        | putative membrane protein                                                  | PPPF00892: EamA-like transporter family                                                                                                                                                                          | -                                                                              |
| wcw_0998  | SucB         | 1                        | 2-oxoglutarate dehydrogenase complex E2 component                          | PPPF00364: biotin-requiring enzyme<br>PPPF00198: 2-oxoacid dehydrogenases acyltransferase (catalytic domain)                                                                                                     | -                                                                              |
| wcw_1012  | GyrA         | 1                        | DNA gyrase subunit A                                                       | PPPF03989: DNA gyrase C-terminal domain, beta-propeller                                                                                                                                                          | belongs to the topoisomerase GyrA/ParC subunit family                          |
| wcw_1302  | AroA         | 1                        | 3-phosphoshikimate 1-carboxyvinyltransferase                               | PPPF00275: EPSP synthase (3-phosphoshikimate 1-carboxyvinyltransferase)                                                                                                                                          | belongs to the EPSP synthase family                                            |
| wcw_1334  | TyrS         | 1                        | tyrosyl-tRNA synthetase                                                    | -                                                                                                                                                                                                                | belongs to the class-I aminoacyl-tRNA synthetase family. TyrS type 1 subfamily |
| wcw_1428  | -            | 1                        | conserved hypothetical protein                                             | PPPF09346: SMI1/KNR4 family (SUH1-1)                                                                                                                                                                             | -                                                                              |
| wcw_1442  | Lon1         | 1                        | Lon ATP-dependent protease                                                 | PPPF00004: ATPase family associated with various cellular activities (AAA)<br>PPPF02190: ATP-dependent protease La (LON) substrate-binding domain<br>PPPF05362: Lon protease (S16) C-terminal proteolytic domain | belongs to the peptidase S16 family                                            |
| wcw_1535  | -            | 1                        | conserved hypothetical protein                                             | -                                                                                                                                                                                                                | -                                                                              |
| wcw_1564  | HemA         | 1                        | putative glutamyl-tRNA reductase                                           | PPPF01488: shikimate/quininate 5-dehydrogenase<br>PPPF05201: glutamyl-tRNA(Glu) reductase, N-terminal domain                                                                                                     | belongs to the glutamyl-tRNA reductase family                                  |
| wcw_1647  | Rho          | 1                        | transcription termination factor rho                                       | PPPF07497: Rho termination factor, RNA-binding domain<br>PPPF00006: ATP synthase alpha/beta family, nucleotide binding domain<br>PPPF07498: Rho termination factor, N-terminal domain                            | belongs to the Rho family                                                      |
| wcw_1648  | -            | 1                        | conserved hypothetical protein                                             | -                                                                                                                                                                                                                | -                                                                              |
| wcw_1670  | -            | 1                        | ABC-type transporter, permease subunit                                     | PPPF00950: ABC 3 transport family                                                                                                                                                                                | belongs to the ABC-3 integral membrane protein family                          |
| wcw_1849  | GroEL3       | 1                        | chaperonin GroEL                                                           | PPPF00118: TCP-1/cpn60 chaperonin family                                                                                                                                                                         | belongs to the chaperonin (HSP60) family                                       |
| wcw_1869  | PepP         | 1                        | aminopeptidase P                                                           | PPPF01321: creatinase/Prolidase N-terminal domain<br>PF: PF00557 Metallopeptidase family M24                                                                                                                     | -                                                                              |

**Table 2. (b).** Yeast Two Hybrid hits of RodZ interactors. A total of 44 putative RodZ interactors not conserved in all members of the *Chlamydiales* order.

| Locus_tag | Protein name | Occurrence in the screen | Product description                                 | Predicted domains                                                                                                                                                                                  | Similarity                                                                               |
|-----------|--------------|--------------------------|-----------------------------------------------------|----------------------------------------------------------------------------------------------------------------------------------------------------------------------------------------------------|------------------------------------------------------------------------------------------|
| wcw_1322  | MrpC         | 62                       | multiple resistance and pH homeostasis system       | PFPP00420: NADH-ubiquinone/plastoquinone oxidoreductase chain 4L                                                                                                                                   | -                                                                                        |
| wcw_0480  | NorB         | 15                       | nitric oxid reductase                               | PEPF00115: cytochrome C and quinol oxidase polypeptide I                                                                                                                                           | -                                                                                        |
| wcw_0273  | -            | 10                       | conserved hypothetical protein                      | PFPP03729: short repeat of unknown function (DUF308)                                                                                                                                               | -                                                                                        |
| wcw_1213  | -            | 10                       | putative membrane-bound serine protease             | PEPF01972: serine dehydrogenase proteinase                                                                                                                                                         | -                                                                                        |
| wcw_1726  | -            | 9                        | putative transporter                                | PFPP02080: TrkA-C domain<br>PFPP03600: citrate transporter                                                                                                                                         | -                                                                                        |
| wcw_0015  | OpgH         | 7                        | putative glucan biosynthesis                        | PFPP13632: glycosyl transferase family group 2                                                                                                                                                     | -                                                                                        |
| wcw_0041  | -            | 6                        | hypothetical protein                                | -                                                                                                                                                                                                  | -                                                                                        |
| wcw_1781  | -            | 6                        | transferase                                         | PFPP13231: dolichyl-phosphate-mannose-protein mannosyltransferase                                                                                                                                  | -                                                                                        |
| wcw_1765  | -            | 4                        | putative transporter membrane protein               | PFPP04632: fusaric acid resistance protein family                                                                                                                                                  | -                                                                                        |
| wcw_0987  | -            | 3                        | putative mechanosensitive channel                   | PFPP00924: mechanosensitive ion channel                                                                                                                                                            | -                                                                                        |
| wcw_1725  | -            | 3                        | Ca <sup>2+</sup> /Na <sup>+</sup> antiporter        | PFPP01699: sodium/calcium exchanger protein                                                                                                                                                        | -                                                                                        |
| wcw_1818  | Wzx          | 3                        | O-antigen translocase                               | PFPP13440: polysaccharide biosynthesis protein                                                                                                                                                     | -                                                                                        |
| wcw_0648  | -            | 2                        | hypothetical protein                                | -                                                                                                                                                                                                  | -                                                                                        |
| wcw_1052  | -            | 2                        | hypothetical protein                                | -                                                                                                                                                                                                  | -                                                                                        |
| wcw_1101  | HtpX         | 2                        | putative heat shock protein HtpX                    | PFPP01435: peptidase family M48                                                                                                                                                                    | -                                                                                        |
| wcw_1136  | -            | 2                        | putative sensory histidine kinase                   | PFPP13426: PAS domain<br>PFPP02518: histidine kinase-, DNA gyrase B-, and HSP90-like ATPase<br>PFPP03924: CHASE domain<br>PFPP00512: His Kinase A (phospho-acceptor) domain<br>PFPP08448: PAS fold | -                                                                                        |
| wcw_1311  | -            | 2                        | putative membrane protein                           | -                                                                                                                                                                                                  | -                                                                                        |
| wcw_1321  | MrpD         | 2                        | multiple resistance and pH homeostasis system       | PFPP00361: proton-conducting membrane transporter                                                                                                                                                  | -                                                                                        |
| wcw_1577  | -            | 2                        | hypothetical protein                                | -                                                                                                                                                                                                  | -                                                                                        |
| wcw_1717  | YbhS         | 2                        | inner membrane transport permease YbhS              | PFPP12698: ABC-2 family transporter protein                                                                                                                                                        | -                                                                                        |
| wcw_p0003 | -            | 1                        | hypothetical protein                                | -                                                                                                                                                                                                  | -                                                                                        |
| wcw_0139  | -            | 1                        | putative trehalose/maltose hydrolase                | PFPP03636: glycosyl hydrolase family 65, N-terminal domain<br>PFPP03633: glycosyl hydrolase family 65, C-terminal domain<br>PFPP03632: glycosyl hydrolase family 65 central catalytic domain       | -                                                                                        |
| wcw_0165  | -            | 1                        | hypothetical protein                                | -                                                                                                                                                                                                  | -                                                                                        |
| wcw_0326  | -            | 1                        | putative membrane protein                           | PFPP13519: von Willebrand factor type A domain                                                                                                                                                     | -                                                                                        |
| wcw_0341  | PyrB         | 1                        | aspartate carbamoyltransferase, catalytic subunit   | PFPP00185: aspartate/ornithine carbamoyltransferase, Asp/Orn binding domain<br>PFPP02729: aspartate/ornithine carbamoyltransferase, carbamoyl-P binding domain                                     | belongs to the ATCase/OTCase family                                                      |
| wcw_0399  | -            | 1                        | hypothetical protein                                | -                                                                                                                                                                                                  | -                                                                                        |
| wcw_0409  | -            | 1                        | hypothetical protein                                | PFPP13166: AAA domain                                                                                                                                                                              | -                                                                                        |
| wcw_0485  | CyoE         | 1                        | protoheme IX farnesyltransferase                    | PFPP01040: UbiA prenyltransferase family                                                                                                                                                           | belongs to the UbiA prenyltransferase family. Protoheme IX farnesyltransferase subfamily |
| wcw_0495  | -            | 1                        | putative bumetanide-sensitive Na-K-Cl cotransporter | PFPP03522: solute carrier family 12<br>PFPP00324: amino acid permease                                                                                                                              | -                                                                                        |
| wcw_0514  | AdhC         | 1                        | NADP-dependent alcohol dehydrogenase C              | PFPP00107: Zinc-binding dehydrogenase<br>PFPP08240: alcohol dehydrogenase GroES-like domain                                                                                                        | belongs to the zinc-containing alcohol dehydrogenase family                              |
| wcw_0692  | -            | 1                        | putative membrane protein                           | -                                                                                                                                                                                                  | -                                                                                        |
| wcw_0756  | -            | 1                        | conserved putative membrane protein                 | PFPP04018: domain of unknown function (DUF368)                                                                                                                                                     | -                                                                                        |
| wcw_0799  | -            | 1                        | permease                                            | PFPP00860: permease family                                                                                                                                                                         | -                                                                                        |
| wcw_1233  | RadC         | 1                        | DNA repair protein radC family                      | PFPP04002: RadC-like JAB domain                                                                                                                                                                    | belongs to the UPF0758 family                                                            |
| wcw_1528  | -            | 1                        | conserved hypothetical protein                      | -                                                                                                                                                                                                  | -                                                                                        |
| wcw_1569  | -            | 1                        | hypothetical protein                                | -                                                                                                                                                                                                  | -                                                                                        |
| wcw_1620  | SctQ3        | 1                        | putative type III secretion translocase SctQ        | PFPP01052: type III flagellar switch regulator (C-ring) FlhN C-term                                                                                                                                | -                                                                                        |
| wcw_1631  | -            | 1                        | hypothetical protein                                | -                                                                                                                                                                                                  | -                                                                                        |
| wcw_1699  | Nth5         | 1                        | putative ADP/ATP translocase                        | PFPP03219: TLC ATP/ADP transporter                                                                                                                                                                 | belongs to the ADP/ATP translocase tlc family                                            |
| wcw_1827  | AcrB         | 1                        | multidrug efflux transport protein                  | PFPP00873: AcrB/AcrD/AcrF family                                                                                                                                                                   | belongs to the resistance-nodulation-cell division (RND) (TC 2.A.6) family               |
| wcw_1844  | OmpA11       | 1                        | putative membrane protein                           | PFPP05150: <i>Legionella pneumophila</i> major outer membrane protein precursor                                                                                                                    | -                                                                                        |
| wcw_1906  | -            | 1                        | putative membrane protein                           | -                                                                                                                                                                                                  | -                                                                                        |
| wcw_1919  | Ynal         | 1                        | putative mscS family protein                        | PFPP00924: mechanosensitive ion channel                                                                                                                                                            | -                                                                                        |
| wcw_1968  | -            | 1                        | conserved hypothetical protein                      | PFPP00355: Rieske [2Fe-2S] domain                                                                                                                                                                  | -                                                                                        |
